# Supplementary material
Source: bioRxiv or medRxiv preprint supplement (https://medrxiv.org/highwire/filestream/93722/field_highwire_adjunct_files/0/2020.08.17.20176594-1.pdf)
Supplement: Supplementary file [file 2020.08.17.20176594-1.pdf]

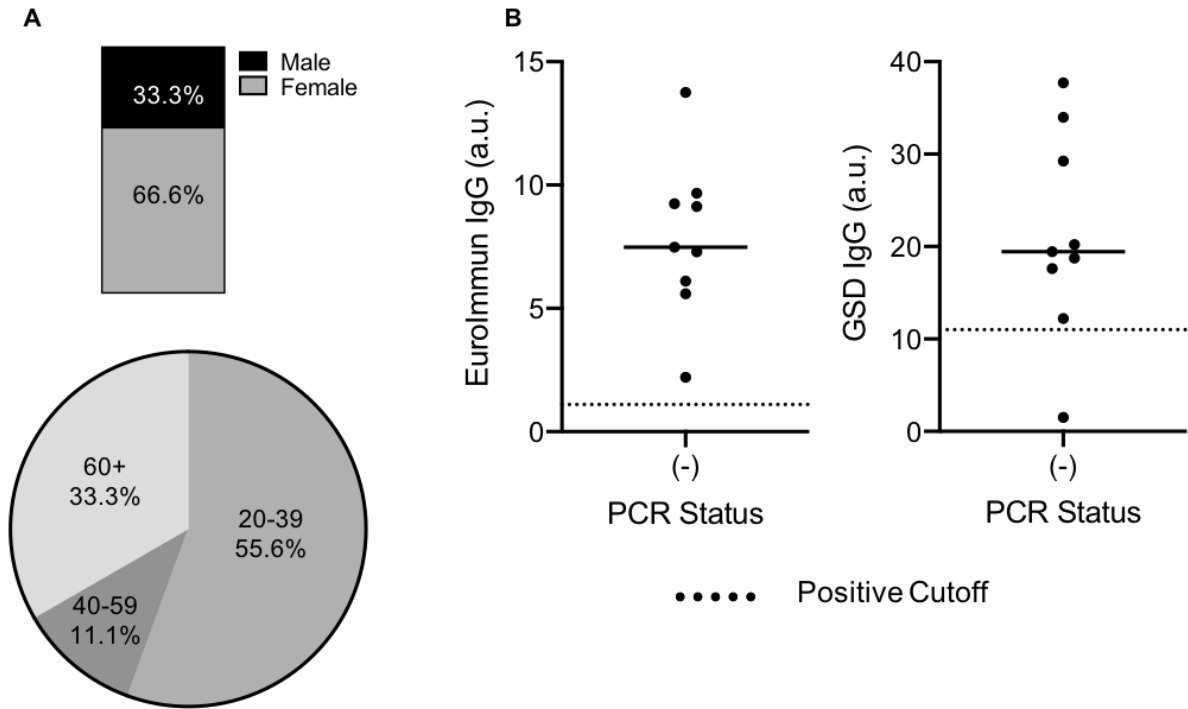

**Supplementary Figure 1.** (A) Demographics of patient population with a positive antibody signal following a negative original PCR result (n=9) out of 68 patients with a negative original PCR result. (B) Detection of antibodies against SARS-CoV-2 by the EuroImmun IgG ELISA (S protein) and the GSD IgG ELISA (N protein) in patients with an original negative PCR result for the virus causing COVID-19.

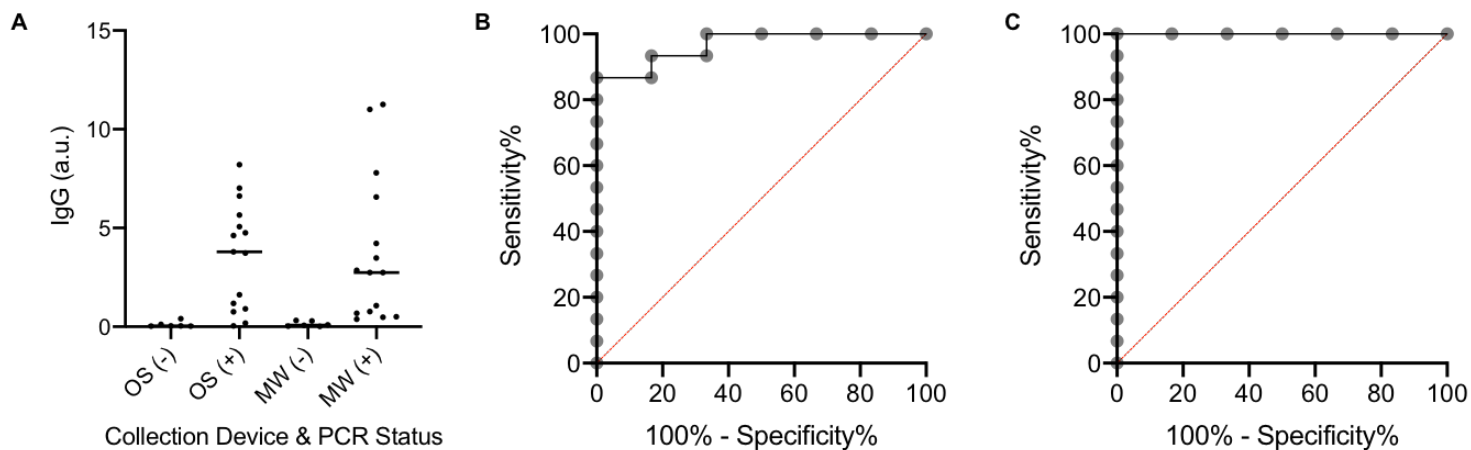

**Supplementary Figure 2.** (A) An in-house formulated mouthwash (MW) and a saliva-based antibody collection device from OraSure Technologies (OS) were compared for antibody detection in 6 PCR-negative and 15 PCR-positive samples. (B) Samples collected from this cohort of participants using the OraSure antibody collection device gave 87% sensitivity and 100% specificity (AUC = 0.967) with a cutoff value of 0.58. (C) Samples collected from this cohort of participants using the in-house formulated mouthwash provided 100% sensitivity and 100% specificity (AUC = 1.000) with a cutoff value of 0.35.

|             | Female only | Male only | Data >21d out from symptom onset | Data >41 days out from symptom onset | Data >61 days out from symptom onset |
|-------------|-------------|-----------|----------------------------------|--------------------------------------|--------------------------------------|
| Sensitivity | 75.6        | 89.2      | 84.9                             | 90.5                                 | 71.4                                 |
| Specificity | 97.4        | 96.4      | 95.6                             | 95.6                                 | 95.6                                 |
| AUC         | 0.943       | 0.981     | 0.975                            | 0.983                                | 0.943                                |

**Supplementary Table 1.** Data were stratified to test whether focusing on certain subpopulations within our clinical cohort improved test sensitivity and specificity
